# Supplementary material
Source: PubMed Central journal article supplement (PMC3855292)

**Supplementary Figure S1.** Lognormal intensity vs. size plots at time = 0 min for (a) pHT1K10, (c) pHT3K10, (e) pHT5K10, and (g) pHK10 and at time = 30 min for (b) pHT1K10, (d) pHT3K10, (f) pHT5K10, and (h) pHK10. N/P = 4.

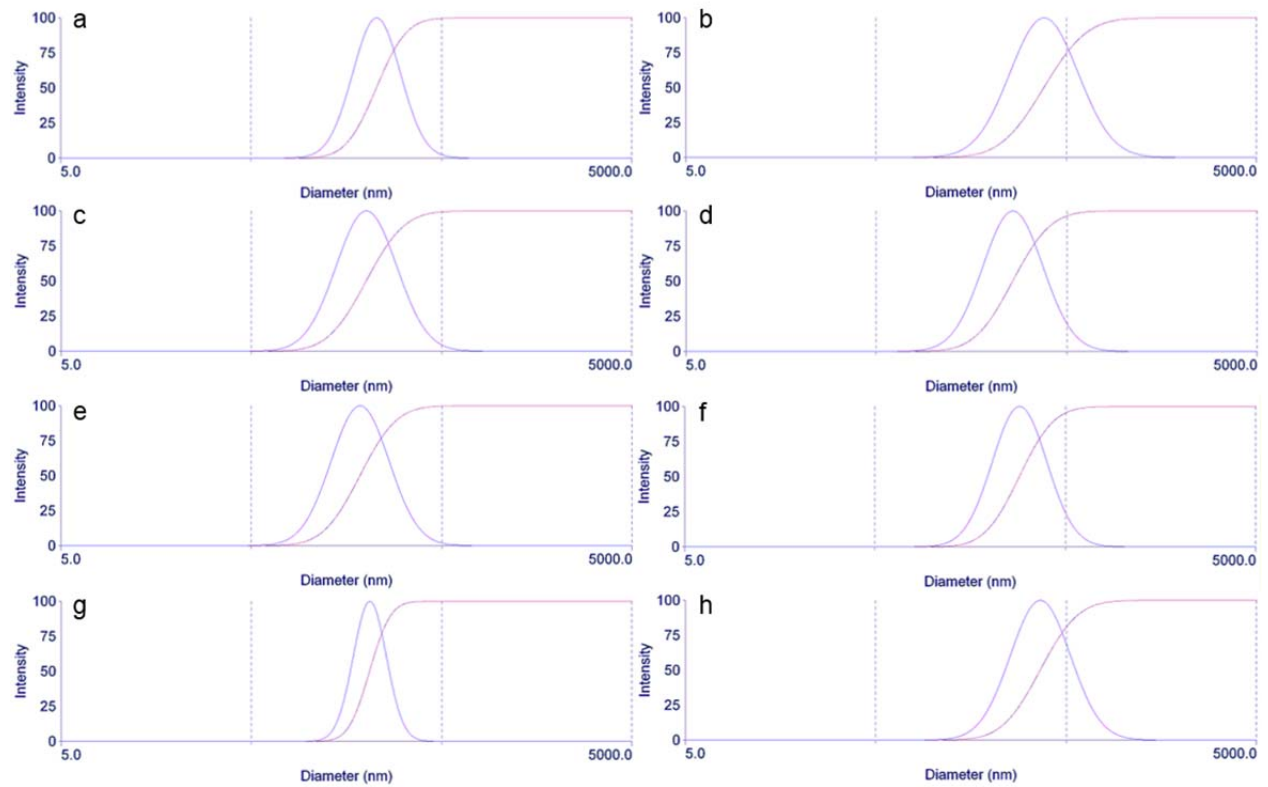

Supplement: NIHMS520883-supplement-1.pdf [file NIHMS520883-supplement-1.pdf]
